# Supplementary material
Source: MDPI journal article supplement (https://www.mdpi.com/2077-1312/11/5/991)
Supplement: s1 [file s1 › jmse-2275010-supplementary.pdf]

Supplementary Materials

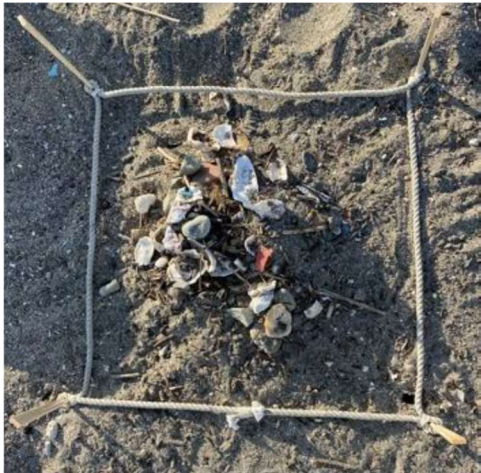

**Figure S1.** Sampling area setting on the beach.

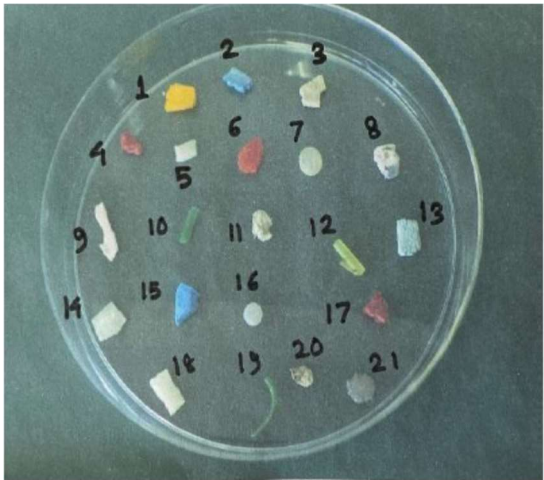

**Figure S2.** Sampled and marked plastic fragments.

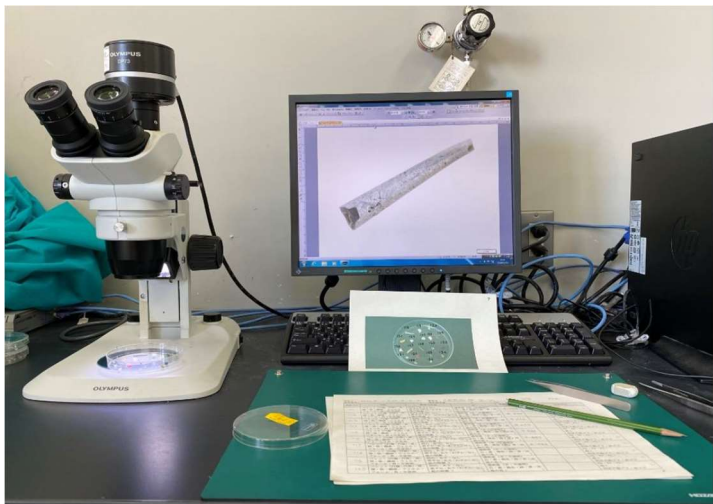

**Figure S3.** Microscope used to find characteristics of the sampled plastic fragments.

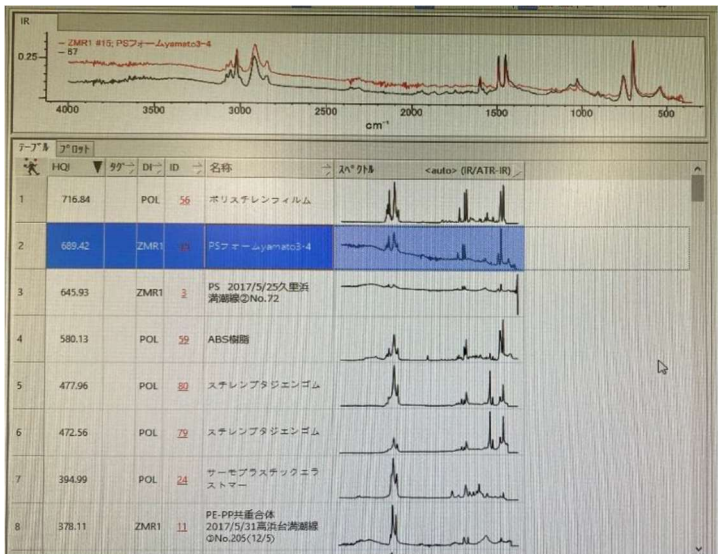

**Figure S4.** Characterizing plastic fragments using FTIR.
